# Supplementary material for: A new mode of pancreatic islet innervation revealed by live imaging in zebrafish
Source: eLife journal article supplement (doi:10.7554/elife.34519), 2018-06-19
Supplement: supp [file elife-34519-supp-v1.zip]

Archive with 13 entries (13 files):
- elife_poa_e34519_Figure_2_video_4.avi
- elife_poa_e34519_Figure_2_video_3.avi
- elife_poa_e34519_Transparent_Reporting_File.pdf
- elife_poa_e34519_Figure_2_video_1.avi
- elife_poa_e34519_Figure_2_video_5.avi
- elife_poa_e34519_Figure_7_figure_supplement_1.pdf
- elife_poa_e34519_Figure_2_figure_supplement_1.pdf
- elife_poa_e34519_Figure_5_figure_supplement_1.pdf
- elife_poa_e34519_Figure_2_video_6.avi
- elife_poa_e34519_Figure_7_figure_supplement_3.pdf
- elife_poa_e34519_Figure_2_video_2.avi
- elife_poa_e34519_Figure_4_figure_supplement_1.pdf
- elife_poa_e34519_Figure_7_figure_supplement_2.pdf
