# Supplementary figures and images for: A new mode of pancreatic islet innervation revealed by live imaging in zebrafish
Source: eLife journal article supplement (doi:10.7554/elife.34519), 2018-06-19

Figure 7-Figure Supplement 1

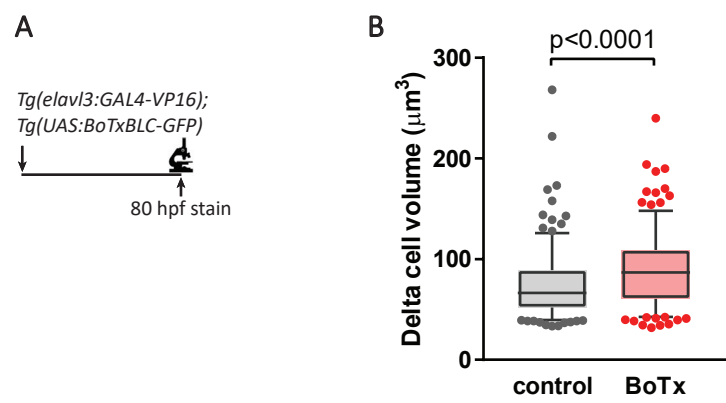

Supplement: supp [file elife-34519-supp-v1.zip › elife_poa_e34519_Figure_7_figure_supplement_1.pdf]

Figure 2-Figure Supplement 1

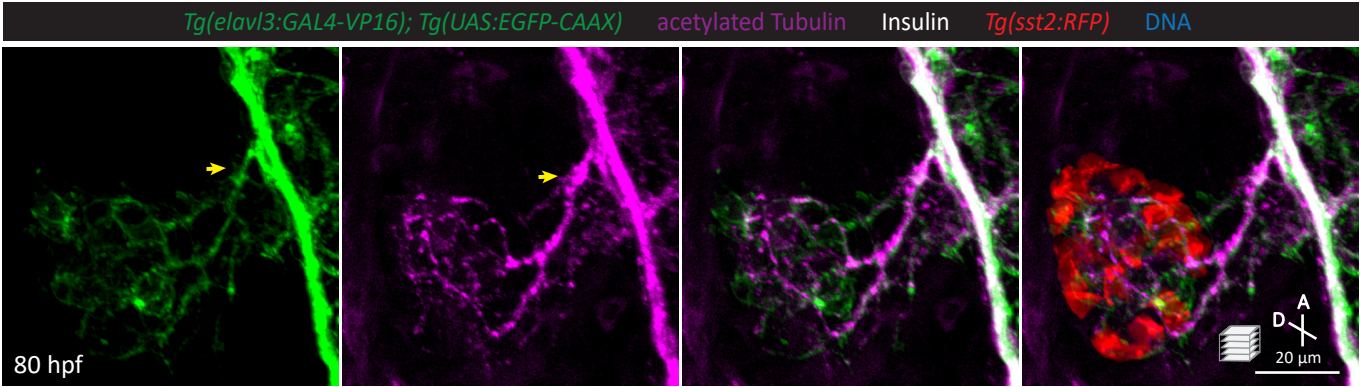

Supplement: supp [file elife-34519-supp-v1.zip › elife_poa_e34519_Figure_2_figure_supplement_1.pdf]

Figure 5-Figure Supplement 1

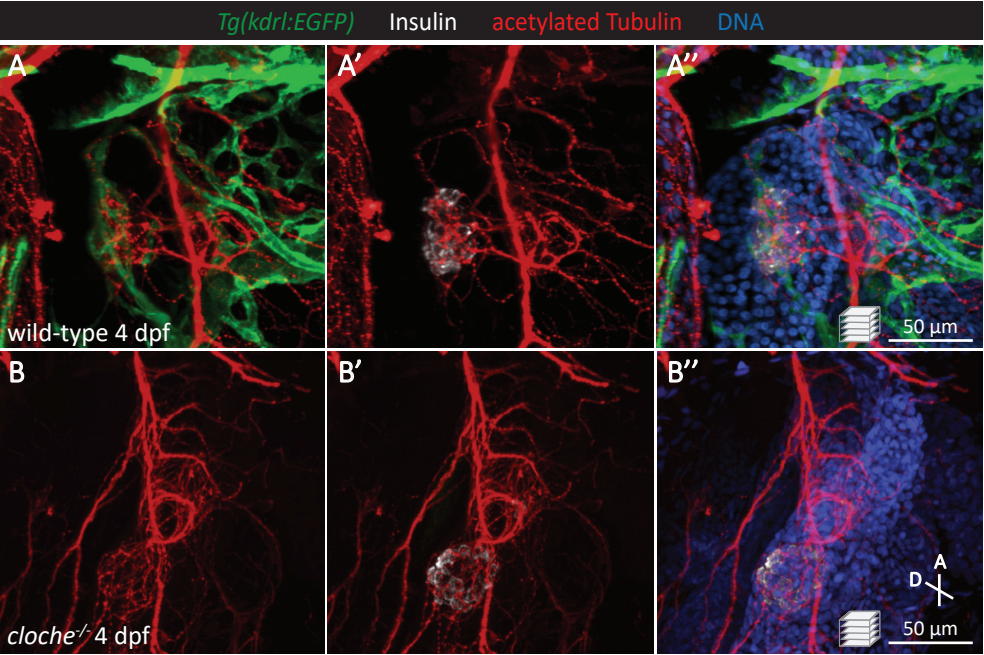

Supplement: supp [file elife-34519-supp-v1.zip › elife_poa_e34519_Figure_5_figure_supplement_1.pdf]

Figure 7-Figure Supplement 3

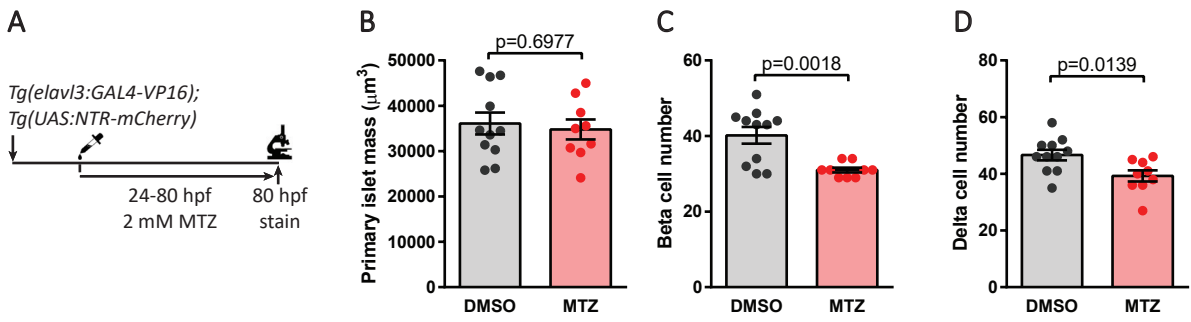

Supplement: supp [file elife-34519-supp-v1.zip › elife_poa_e34519_Figure_7_figure_supplement_3.pdf]

Figure 4-Figure Supplement 1

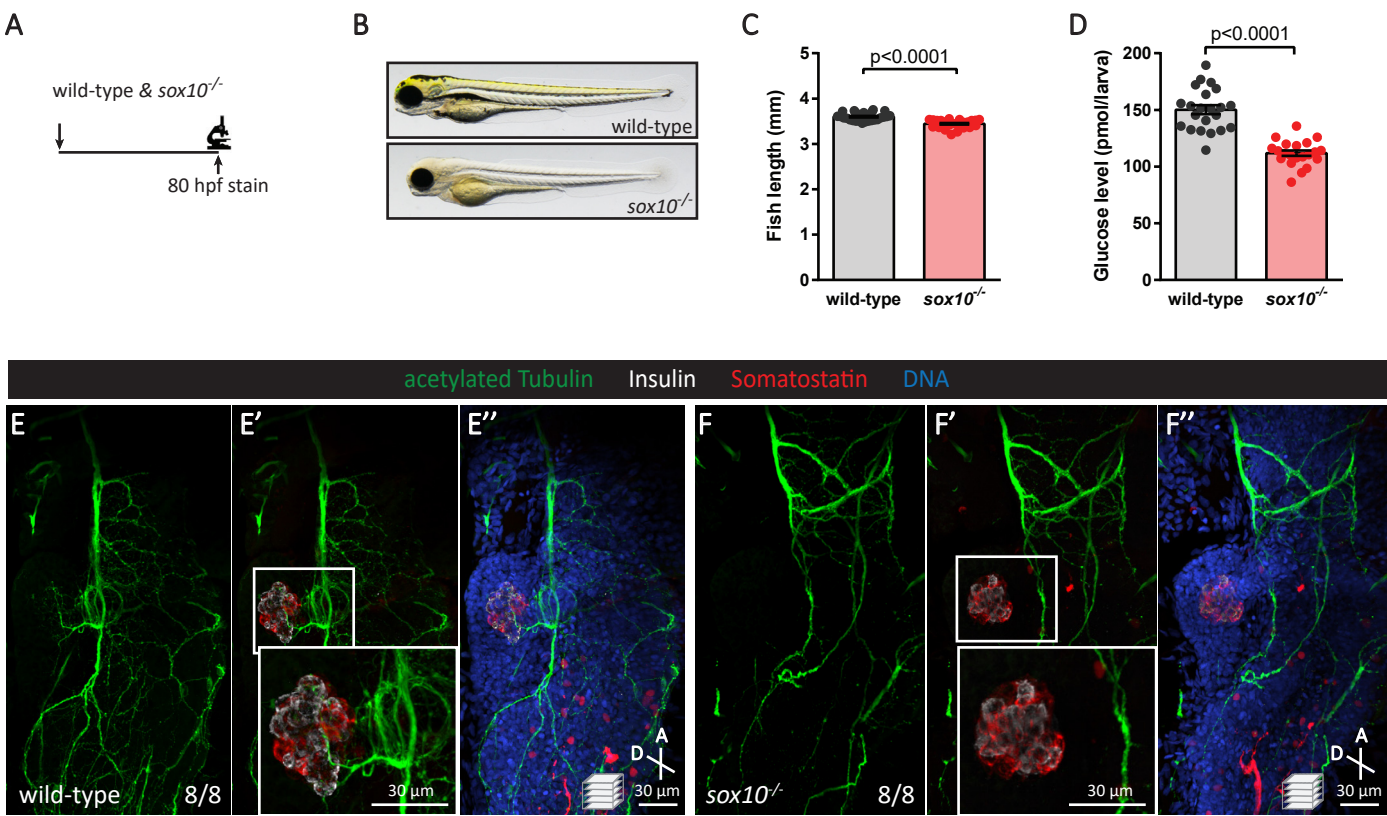

Supplement: supp [file elife-34519-supp-v1.zip › elife_poa_e34519_Figure_4_figure_supplement_1.pdf]

Figure 7-Figure Supplement 2

A

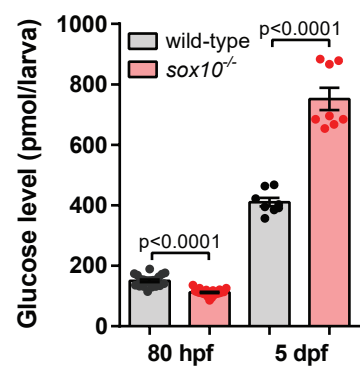

B

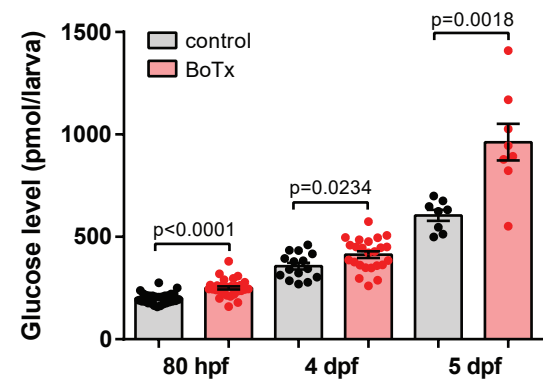

Supplement: supp [file elife-34519-supp-v1.zip › elife_poa_e34519_Figure_7_figure_supplement_2.pdf]
